# Supplementary material
Source: PubMed Central journal article supplement (PMC2084331)

30  
mg/kg

70  
mg/kg

100  
mg/kg

A

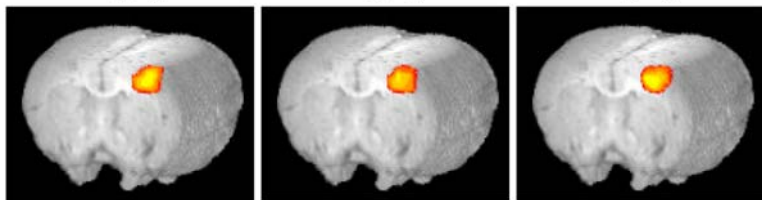

0  6  
t value

B

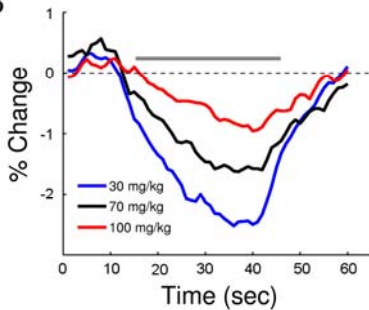

C

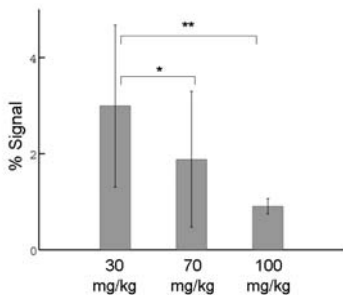

Supplement: pnas_0705791104_1.pdf [file pnas_0705791104_1.pdf]

**A**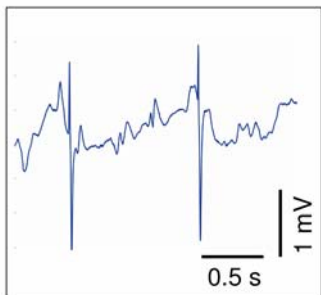**B**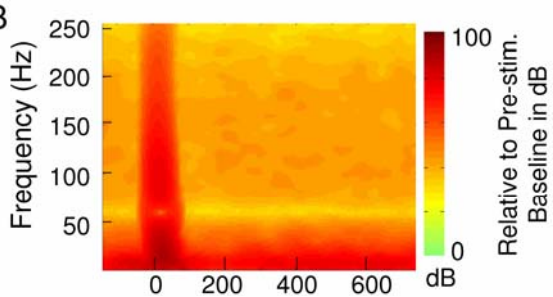**C**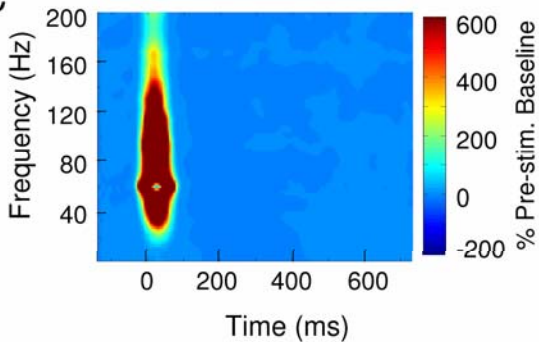

Supplement: pnas_0705791104_2.pdf [file pnas_0705791104_2.pdf]
